# Supplementary material
Source: PubMed Central journal article supplement (PMC5759054)
Supplement: NIHMS919657-supplement-1.pdf [file NIHMS919657-supplement-1.pdf]

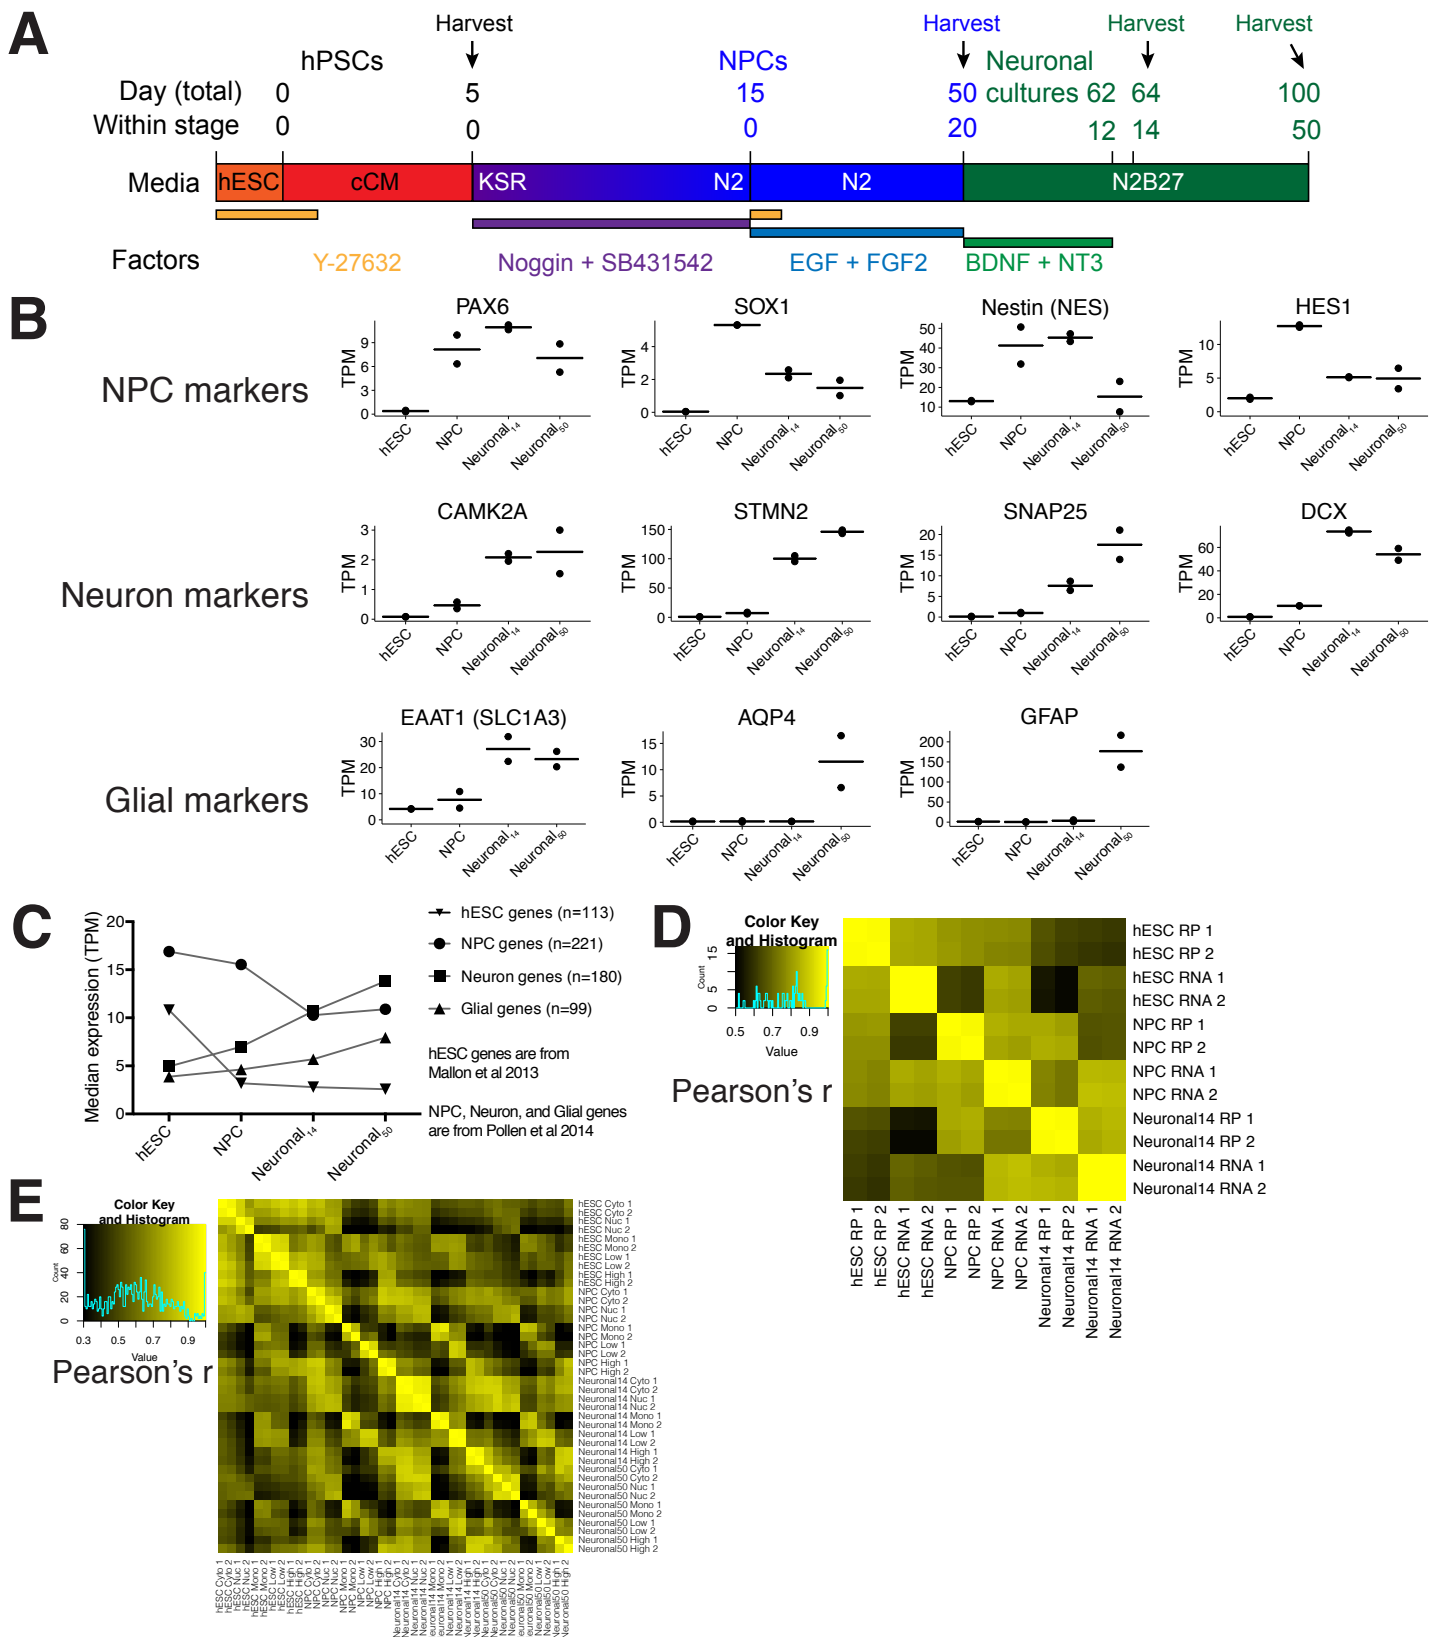

**Figure S1. Neuronal differentiation marker genes and sequencing replicates, Related to Figure 1:** (A) A schematic of the neuronal differentiation protocol. (B) Marker gene expression in cytoplasmic RNAseq. TPM: transcripts per million. Bar: mean; points: expression in each replicate. (C) Median expression for classes of genes representing different cell types. Gene classes from single cell sequencing of human fetal brains in Pollen et al. 2014 or analysis of hESCs in Mallon et al. 2013. Note that Pollen (2014) cannot separate NPC genes from hESC genes as they sequenced human fetal brains (which have no hESCs), leading to overlap. (D) Replicate correlations for ribosome profiling and matched RNAseq. (E) Replicate correlations for cytoplasmic, nuclear, and polysomal (TrIP-seq) RNAseq samples.

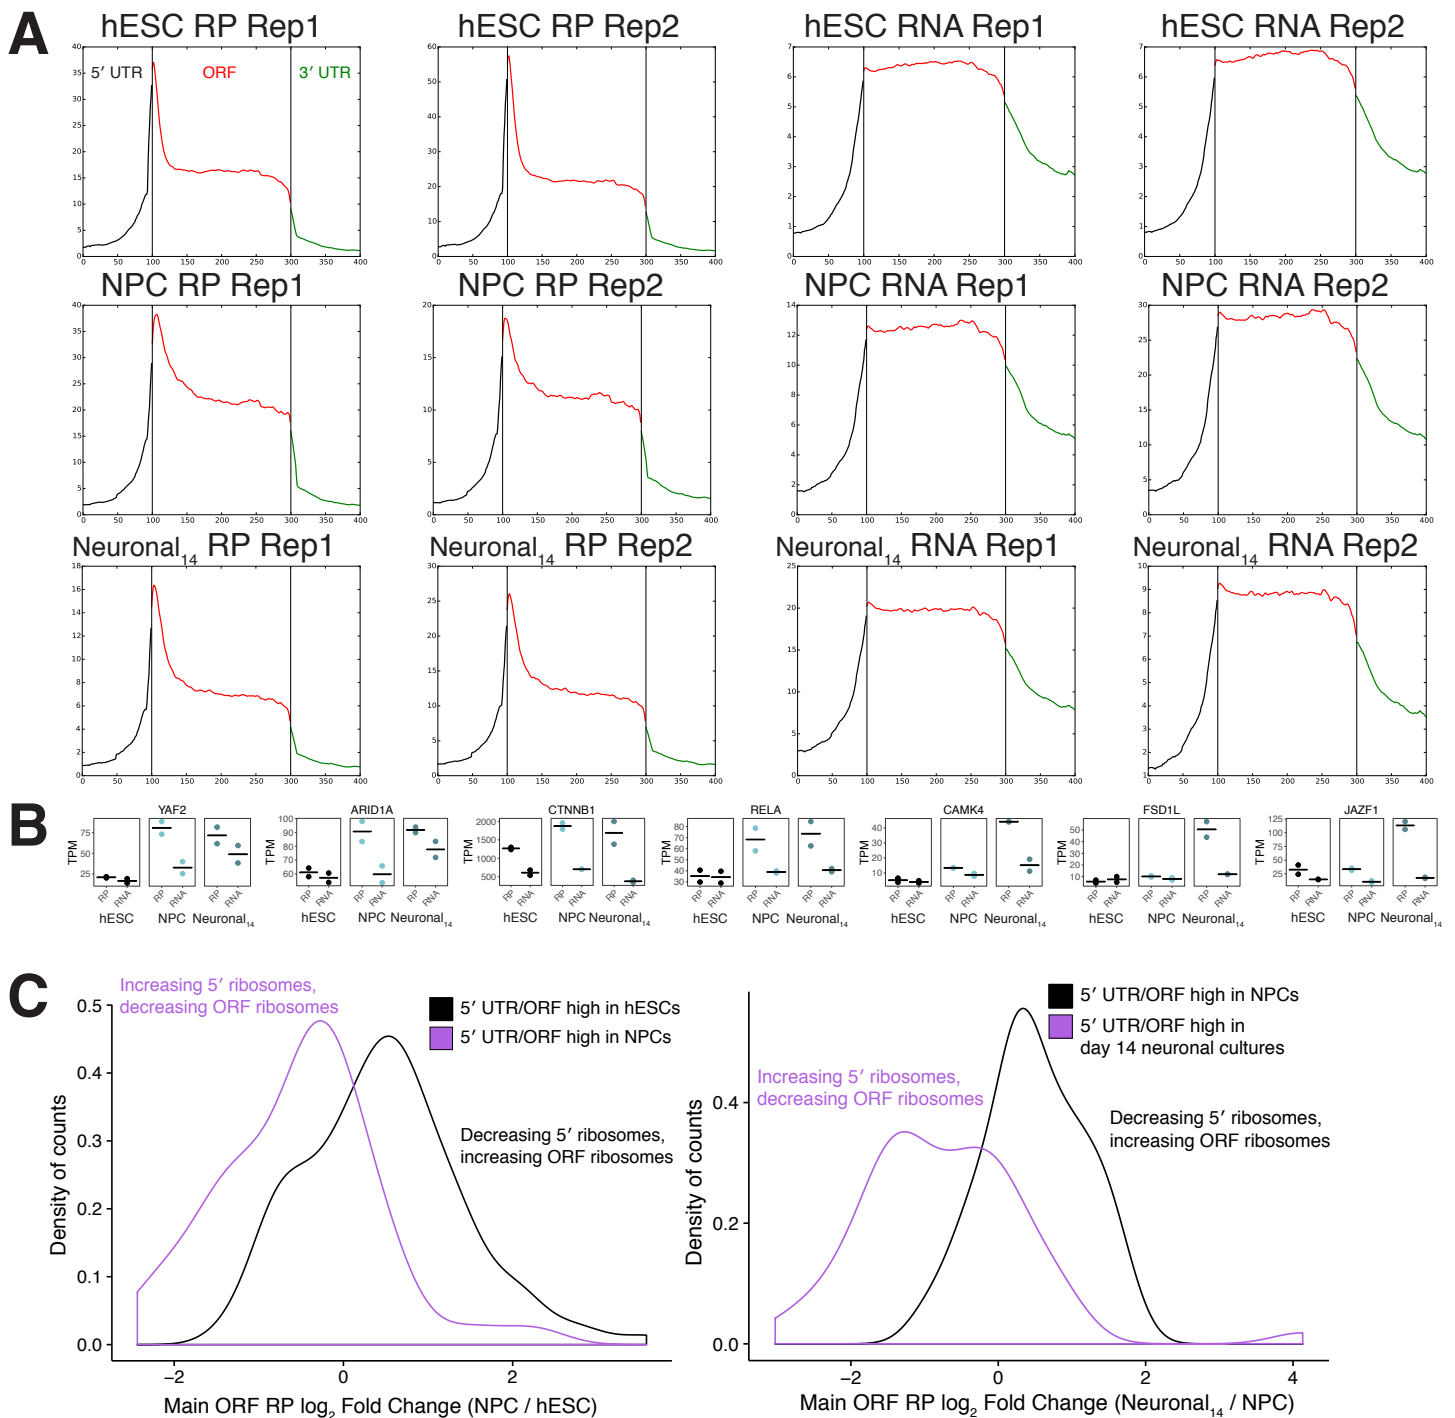

**Figure S2. Metagene plots and 5' UTR ribosome translation changes, Related to Figure 2:** (A) Metagene plots for each replicate of ribosome profiling and RNAseq in hESCs, NPCs and 14 day neuronal cultures. Metagene plots are constructed by collapsing each ORF to 200 bins and averaging RP density across genes, while 5' and 3' UTR regions are the 100 nt before and after each ORF averaged across genes. (B) RP and RNAseq gene expression changes for seven genes related to transcription (left four) or translationally activated in day 14 neuronal cultures (right three). (C) Fold change distributions in ribosome profiling on the main ORF for classes of genes with changes in 5' UTR / ORF occupancy during differentiation. Note the reciprocal relationship between 5' UTR ribosomes and ORF ribosomes. The gene sets with high 5' UTR / ORF ribosome are those in Figure 2B with a fold change > 2 ( $\log_2FC > 1$ ).

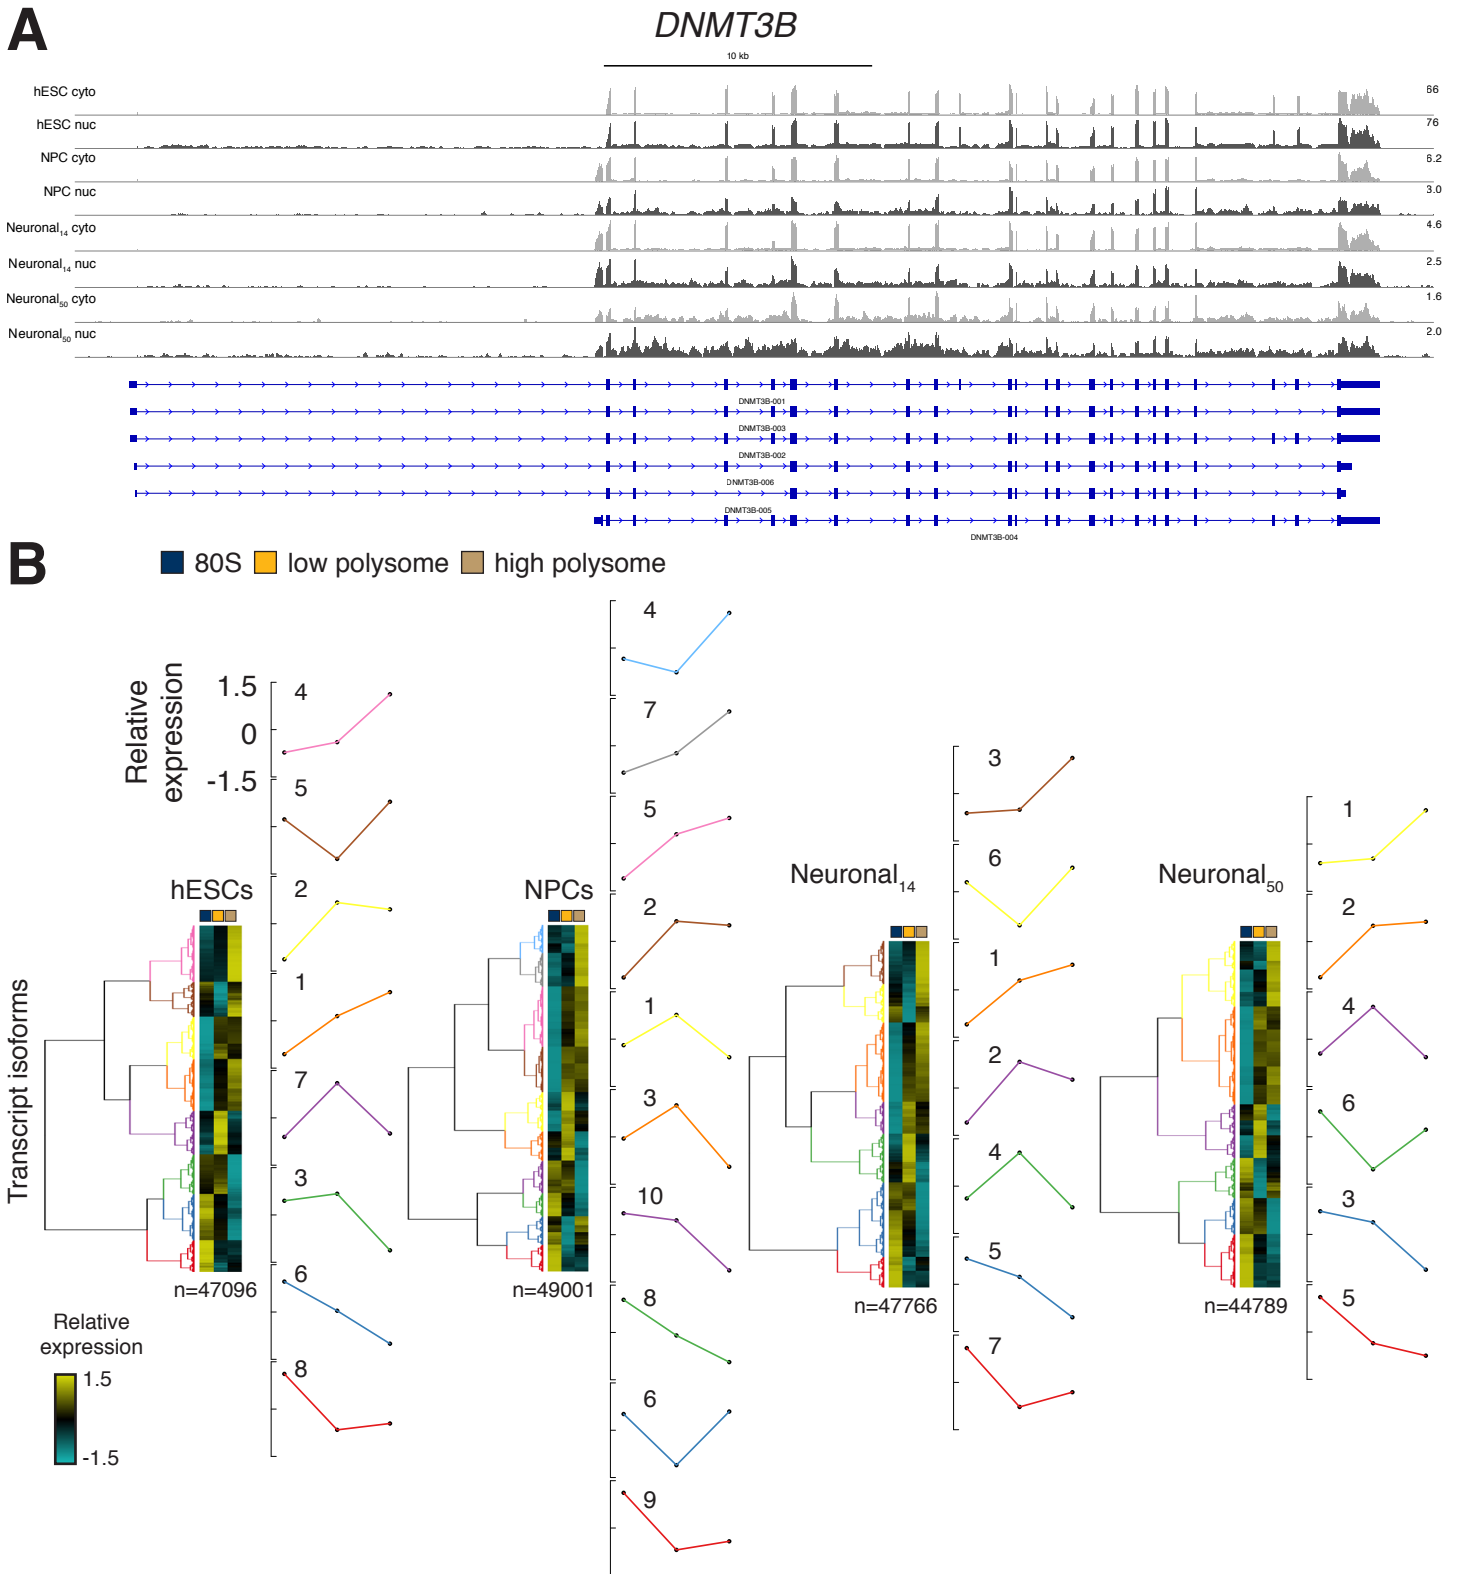

**Figure S3. Intron retention and transcript clusters from TrIP-seq data, Related to Figure 5. (A)**

Unannotated intron retention increases in *DNMT3B* during neural induction. Gray: cytoplasmic RNAseq. Dark gray: nuclear RNAseq. Note also the cell type specific exon inclusion in, for example, the 2nd and 3rd to last exons, among others. (B) The clustering in Figure 5A is reproduced here with associated dendrograms and plots of average expression of all transcripts in each color. Colors of the expression profiles match the colors of the dendrogram. All average plots run from 1.5 to -1.5 in units of relative expression (rlog; see Methods). Cluster IDs are the numbers to the upper left of each cluster average plot.

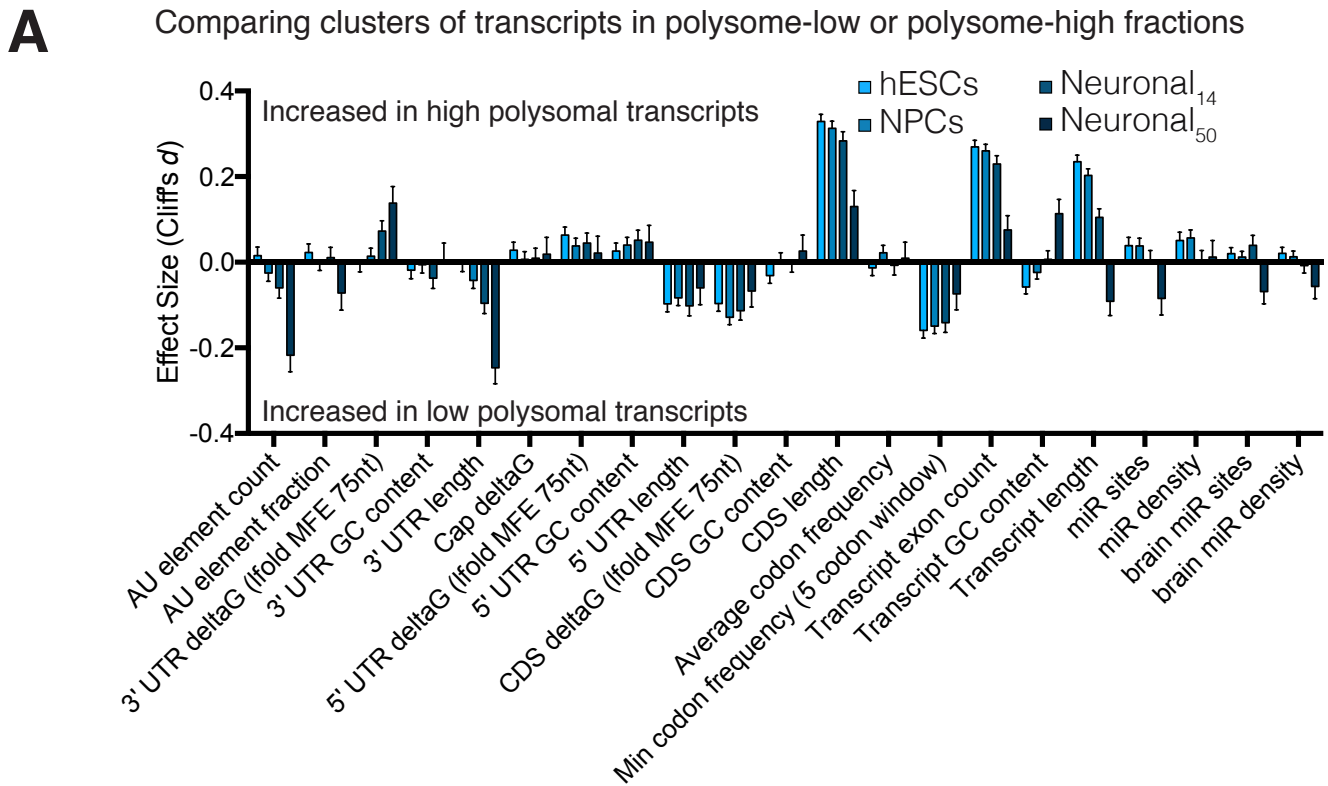

Comparing statistically-significantly different transcripts between polysome-low and polysome-high fractions

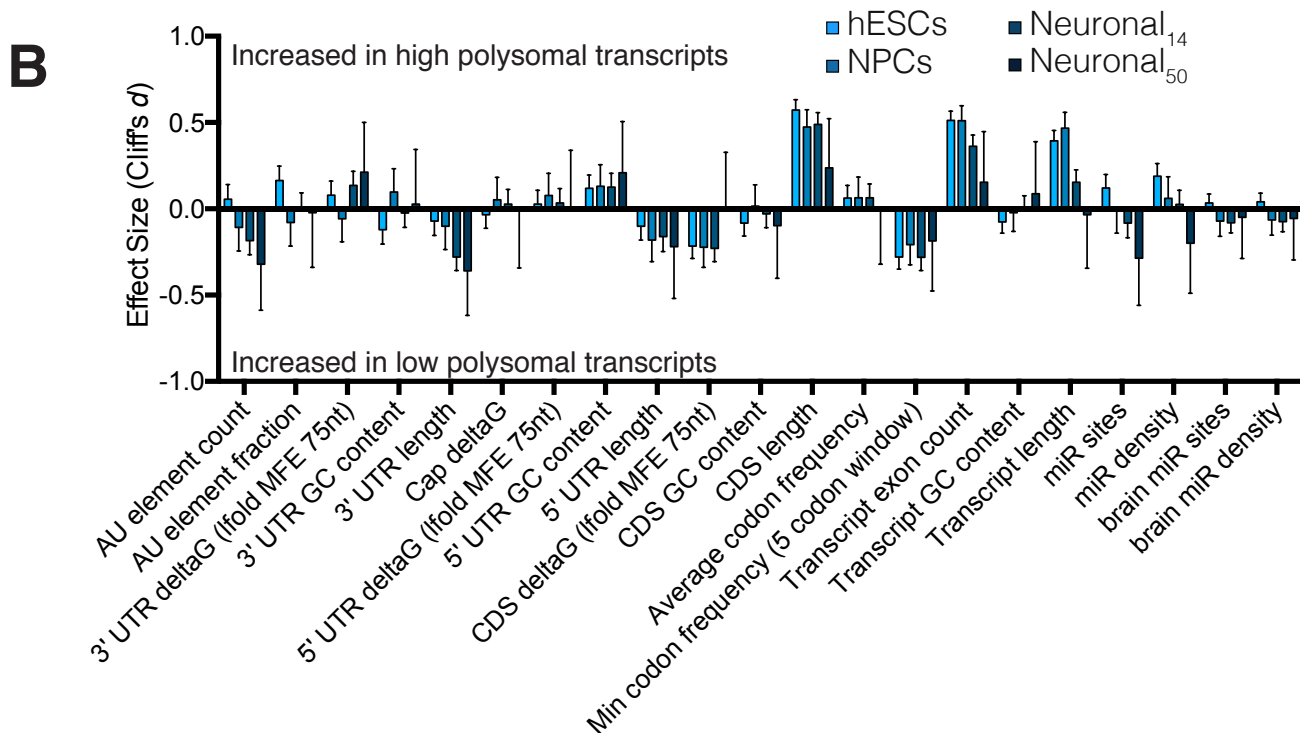

**Figure S4. Transcript features that affect translation between transcript isoforms, Related to Figure 6:** (A) The effect size of 21 different features between transcripts in high polysomal clusters versus those in low polysomal clusters. Different transcript isoforms of the same gene were contrasted. Error bars are 95% confidence intervals. MFE 75nt: minimum free energy across a 75 nucleotide sliding window in the region. Codon frequency is the usage of codons in the human transcriptome. Note: higher deltaG for a set of transcripts implies less stable structures. See Methods for more details. (B) as in (A) but for transcripts identified by DESeq2 as significantly different ( $p < 0.01$ ) between low polysomal fractions and high polysomal fractions.

**Table S3. Gene ontology terms, Related to Figure 2**

| Term (translationally up in hESC vs NPC)                                                                         | ID         | N  | p (Benjamini-corrected) |
|------------------------------------------------------------------------------------------------------------------|------------|----|-------------------------|
| rRNA processing                                                                                                  | GO:0006364 | 85 | 1.07E-45                |
| translational initiation                                                                                         | GO:0006413 | 66 | 2.42E-41                |
| viral transcription                                                                                              | GO:0019083 | 60 | 6.76E-41                |
| translation                                                                                                      | GO:0006412 | 85 | 1.20E-39                |
| SRP-dependent cotranslational protein targeting to membrane                                                      | GO:0006614 | 54 | 7.65E-39                |
| nuclear-transcribed mRNA catabolic process, nonsense-mediated decay                                              | GO:0000184 | 58 | 9.49E-37                |
| mitochondrial translational elongation                                                                           | GO:0070125 | 37 | 1.96E-20                |
| mitochondrial translational termination                                                                          | GO:0070126 | 36 | 3.40E-19                |
| mitochondrial translation                                                                                        | GO:0032543 | 16 | 9.60E-8                 |
| cytoplasmic translation                                                                                          | GO:0002181 | 11 | 0.000                   |
| negative regulation of ubiquitin-protein ligase activity involved in mitotic cell cycle                          | GO:0051436 | 17 | 0.000                   |
| positive regulation of establishment of protein localization to telomere                                         | GO:1904851 | 7  | 0.001                   |
| positive regulation of ubiquitin-protein ligase activity involved in regulation of mitotic cell cycle transition | GO:0051437 | 17 | 0.001                   |
| regulation of mRNA stability                                                                                     | GO:0043488 | 20 | 0.001                   |
| ribosomal small subunit assembly                                                                                 | GO:0000028 | 9  | 0.001                   |
| anaphase-promoting complex-dependent catabolic process                                                           | GO:0031145 | 17 | 0.001                   |
| positive regulation of telomerase RNA localization to Cajal body                                                 | GO:1904874 | 8  | 0.001                   |
| aerobic respiration                                                                                              | GO:0009060 | 11 | 0.001                   |
| protein folding                                                                                                  | GO:0006457 | 27 | 0.001                   |
| ribosomal small subunit biogenesis                                                                               | GO:0042274 | 8  | 0.002                   |
| mRNA splicing, via spliceosome                                                                                   | GO:0000398 | 30 | 0.003                   |
| cell-cell adhesion                                                                                               | GO:0098609 | 34 | 0.003                   |
| positive regulation of protein localization to Cajal body                                                        | GO:1904871 | 6  | 0.003                   |
| maturation of SSU-rRNA from tricistronic rRNA transcript (SSU-rRNA, 5.8S rRNA, LSU-rRNA)                         | GO:0000462 | 10 | 0.006                   |
| NIK/NF-kappaB signaling                                                                                          | GO:0038061 | 14 | 0.008                   |
| RNA processing                                                                                                   | GO:0006396 | 17 | 0.011                   |
| mitochondrial electron transport, ubiquinol to cytochrome c                                                      | GO:0006122 | 7  | 0.011                   |
| oxidation-reduction process                                                                                      | GO:0055114 | 56 | 0.019                   |
| protein stabilization                                                                                            | GO:0050821 | 20 | 0.022                   |
| tRNA aminoacylation for protein translation                                                                      | GO:0006418 | 10 | 0.029                   |
| mitochondrion organization                                                                                       | GO:0007005 | 14 | 0.031                   |
| ribosomal large subunit biogenesis                                                                               | GO:0042273 | 8  | 0.030                   |
| regulation of cellular amino acid metabolic process                                                              | GO:0006521 | 11 | 0.040                   |
| Term (translationally up in NPC vs hESC)                                                                         | ID         | N  | p (Benjamini-corrected) |
| positive regulation of transcription, DNA-templated                                                              | GO:0045893 | 46 | 0.0029                  |
| vascular endothelial growth factor receptor signaling pathway                                                    | GO:0048010 | 14 | 0.0077                  |
| cell migration                                                                                                   | GO:0016477 | 21 | 0.020                   |
| axon guidance                                                                                                    | GO:0007411 | 20 | 0.017                   |

**Table S6: List of antibodies used, Related to Figure 1**

| Antibody                 | Host | Company                   | Cat #        | Western blot dilution |
|--------------------------|------|---------------------------|--------------|-----------------------|
| 4EBP1                    | Rb   | Cell Signaling            | 9644         | 1:1000                |
| phospho-4EBP1 (Ser65)    | Rb   | Cell Signaling            | 9451         | 1:1000                |
| phospho-4EBP1 (Thr37/46) | Rb   | Cell Signaling            | 2855         | 1:1000                |
| B-Actin                  | M    | Sigma                     | a1972        | 1:15000               |
| MAP2                     | Ch   | AbCam                     | ab5392       | 1:10000               |
| MAP2                     | M    | AbCam                     | ab11267      | 1:2000                |
| OCT4                     | Rb   | AbCam                     | ab19857      | 1:1000                |
| S6                       | Rb   | Cell Signaling            | 2317S        | 1:1000                |
| phospho-S6 (Ser240/244)  | Rb   | Cell Signaling            | 5364S        | 1:2000                |
| TSC2                     | Rb   | Cell Signaling            | 4308         | 1:1000                |
| eIF3D                    | Rb   | Bethyl                    | A301-758A    | 1:1000                |
| RPLP1                    | Rb   | Abcam                     | Ab121190     | 1:250                 |
| eIF4B                    | M    | Cell Signaling technology | 13088S       | 1:1000                |
| Pax6                     | Rb   | Covance                   | PRB-278P-100 | 1:500                 |
| Syn1                     | M    | SySy                      | 106001       |                       |
| CamKIIa                  | M    | Cell Signaling technology | 50049        | 1:500                 |
| GLUR1                    | Rb   | Millipore                 | Ab1504       | 1:500                 |
| phospho-TSC2 (Ser1387)   | Rb   | Cell Signaling technology | 5584         | 1:1000                |
| phospho-p70S6K (Thr389)  | Rb   | Cell Signaling technology | 9234         | 1:500                 |
| p70S6K                   | Rb   | Cell Signaling technology | 2708         | 1:500                 |

**Supplemental experimental procedures:****RNA-seq library prep:**

An Agilent Bioanalyzer was used to determine the RNA integrity (RIN) for each sample, which was typically > 6. Libraries were prepared using the TruSeq Stranded Total RNA Library Prep Kit (Illumina) starting with 100 ng of RNA from each sample or pool with 6 minutes fragmentation time and 13 PCR cycles.

**Ribosome profiling library prep:**

Ribosome profiling libraries were prepared using a standard protocol (McGlinchey and Ingolia, 2017), with minor modifications. Sucrose gradient purification of 80S monosomes was used and RNA was extracted from the 80S peak as above. A larger fragment size was selected, from about 20nt to 40 nt, as reports have shown variability in the protected footprint size (Guydosh and Green, 2014; Lareau et al., 2014). Matched RNA-seq libraries were constructed with the ribosome profiling library prep using RNA that was fragmented by incubating for 20 minutes at 95 degrees in 1 mM EDTA, 6 mM Na<sub>2</sub>CO<sub>3</sub>, 44 mM NaHCO<sub>3</sub>, pH 9.3. PCR was performed for 8 or 10 PCR cycles, depending on the library. The RNase digestion repeatedly overdigested ribosomes derived from 50 day old neuronal cultures causing them to fall apart during purification, precluding collection of ribosome protected footprints from these cells. Metagene plots were made using metagene-maker (<https://github.com/stephenfloor/metagene-maker>).

**High-throughput sequencing:**

All libraries were sequenced on an Illumina HiSeq 4000. Index bleed issues were corrected for in ribosome profiling libraries using read-internal indexes. Index bleed appeared to be a minor issue in polysomal TrIP-

seq data, as, for example, OCT4 expression was tightly restricted to hESC libraries (Figure 1C). Total RNA libraries were sequenced in 100bp paired-end format, while ribosome profiling libraries were sequenced in 50bp single-read format. Sequencing was performed at the Vincent J. Coates Genomics Sequencing Laboratory at UC Berkeley.

#### **Polysome profiling:**

Sucrose gradients from 10-50% were made in 100 mM KCl, 20 mM HEPES pH 7.6 and 5 mM MgCl<sub>2</sub> with 100 µg/ml cycloheximide and 0.66 U/µl Superscript In (Thermo-Fisher) and pre-chilled in centrifuge buckets for at least 30 minutes before use. 100 µl of lysate was then applied to the top of a 12 ml 10-50% sucrose gradient. Tubes were spun for 2 hours at 36,000 RPM (221,632 g) in a SW-41 rotor. The bottom of the tube was punctured and 2M sucrose pumped in using a peristaltic pump. Absorbance at 260 nm was monitored using a Brandel (Gaithersburg, MD) gradient fractionator and ISCO (Lincoln, NE) UA-6 detector. Peaks were fractionated into separate tubes, which were ethanol precipitated by adding 2 µl glycoblue (Thermo), 1:10 volumes 3M NaOAc pH 5.2 and 2 volumes 100% ethanol. Samples were resuspended, DNase treated using RQ1 RNase-free DNase (Promega), acid phenol:chloroform extracted, and ethanol precipitated as above. Samples were then resuspended in 20 µl DEPC-treated water and RNA concentration was measured using a Qubit (Life Technologies).

#### **Western blotting:**

Cells were harvested in lysis buffer containing 2 mM EDTA, 2 mM EGTA, 1% Triton-X, and 0.5% SDS in PBS with Halt phosphatase inhibitor cocktail and Complete mini EDTA-free protease inhibitor cocktail. Total protein was determined by BCA assay, and 10 µg of protein in Laemmli sample buffer were loaded onto 4–15% Criterion TGX gels. Proteins were transferred to PVDF membranes, blocked in 5% milk in TBS-Tween for one hour at room temperature (RT), and incubated with primary antibodies diluted in 5% milk in TBS-Tween overnight at 4°C. The following day, membranes were incubated with HRP-conjugated secondary antibodies for one hour at RT, washed, incubated with chemiluminescence substrate and developed on GE Amersham Hyperfilm ECL. Membranes were stripped with 6M guanidine hydrochloride to re-blot on subsequent days.

#### **Electrophysiology in day 50 neuronal cultures:**

Whole cell patch clamp recordings were made at room temperature from visually identified neurons grown on coverslips for 54-56 days after differentiation from NPCs. Cells were superfused with ACSF containing (in mM): 123 NaCl, 25 D-Glucose, 10 HEPES, 25 NaHCO<sub>3</sub>, 5 KCl, 1 Na<sub>2</sub>H<sub>2</sub>PO<sub>4</sub>, 2 CaCl<sub>2</sub>, and 1 MgCl<sub>2</sub>. Internal solution contained (in mM): 135 KMeSO<sub>4</sub>, 10 HEPES, 4 MgCl<sub>2</sub>, 4 Na-ATP, 0.4 Na-GTP, 10 phosphocreatine-Na<sub>2</sub>, and 1 EGTA. For current clamp recordings, the membrane potential was adjusted to -70mV and one second steps of depolarizing current (from +5-50pA) were injected to elicit action potentials. To measure excitatory synaptic activity, voltage clamp recordings were obtained at -70mV. Spontaneous excitatory synaptic currents were recorded before and five minutes after wash-in of the AMPA receptor blocker NBQX (10µM).

Gydosh, N.R., and Green, R. (2014). Dom34 rescues ribosomes in 3' untranslated regions. *Cell* 156, 950-962.

Lareau, L.F., Hite, D.H., Hogan, G.J., and Brown, P.O. (2014). Distinct stages of the translation elongation cycle revealed by sequencing ribosome-protected mRNA fragments. *Elife* 3, e01257.

McGlincy, N.J., and Ingolia, N.T. (2017). Transcriptome-wide measurement of translation by ribosome profiling. *Methods*.
