# Supplementary material
Source: PubMed Central journal article supplement (PMC5759054)
Supplement: NIHMS919657-supplement-4.pdf [file NIHMS919657-supplement-4.pdf]

## Supplemental Table 3 - related to Figure 2

| Term (translationally up in hESC vs NPC)                                                                         | ID         | N  | p (Benjamini-corrected) |
|------------------------------------------------------------------------------------------------------------------|------------|----|-------------------------|
| rRNA processing                                                                                                  | GO:0006364 | 85 | 1.07E-45                |
| translational initiation                                                                                         | GO:0006413 | 66 | 2.42E-41                |
| viral transcription                                                                                              | GO:0019083 | 60 | 6.76E-41                |
| translation                                                                                                      | GO:0006412 | 85 | 1.20E-39                |
| SRP-dependent cotranslational protein targeting to membrane                                                      | GO:0006614 | 54 | 7.65E-39                |
| nuclear-transcribed mRNA catabolic process, nonsense-mediated decay                                              | GO:0000184 | 58 | 9.49E-37                |
| mitochondrial translational elongation                                                                           | GO:0070125 | 37 | 1.96E-20                |
| mitochondrial translational termination                                                                          | GO:0070126 | 36 | 3.40E-19                |
| mitochondrial translation                                                                                        | GO:0032543 | 16 | 9.60E-8                 |
| cytoplasmic translation                                                                                          | GO:0002181 | 11 | 0.000                   |
| negative regulation of ubiquitin-protein ligase activity involved in mitotic cell cycle                          | GO:0051436 | 17 | 0.000                   |
| positive regulation of establishment of protein localization to telomere                                         | GO:1904851 | 7  | 0.001                   |
| positive regulation of ubiquitin-protein ligase activity involved in regulation of mitotic cell cycle transition | GO:0051437 | 17 | 0.001                   |
| regulation of mRNA stability                                                                                     | GO:0043488 | 20 | 0.001                   |
| ribosomal small subunit assembly                                                                                 | GO:0000028 | 9  | 0.001                   |
| anaphase-promoting complex-dependent catabolic process                                                           | GO:0031145 | 17 | 0.001                   |
| positive regulation of telomerase RNA localization to Cajal body                                                 | GO:1904874 | 8  | 0.001                   |
| aerobic respiration                                                                                              | GO:0009060 | 11 | 0.001                   |
| protein folding                                                                                                  | GO:0006457 | 27 | 0.001                   |
| ribosomal small subunit biogenesis                                                                               | GO:0042274 | 8  | 0.002                   |
| mRNA splicing, via spliceosome                                                                                   | GO:0000398 | 30 | 0.003                   |
| cell-cell adhesion                                                                                               | GO:0098609 | 34 | 0.003                   |
| positive regulation of protein localization to Cajal body                                                        | GO:1904871 | 6  | 0.003                   |
| maturation of SSU-rRNA from tricistronic rRNA transcript (SSU-rRNA, 5.8S rRNA, LSU-rRNA)                         | GO:0000462 | 10 | 0.006                   |
| NIK/NF-kappaB signaling                                                                                          | GO:0038061 | 14 | 0.008                   |
| RNA processing                                                                                                   | GO:0006396 | 17 | 0.011                   |
| mitochondrial electron transport, ubiquinol to cytochrome c                                                      | GO:0006122 | 7  | 0.011                   |
| oxidation-reduction process                                                                                      | GO:0055114 | 56 | 0.019                   |
| protein stabilization                                                                                            | GO:0050821 | 20 | 0.022                   |
| tRNA aminoacylation for protein translation                                                                      | GO:0006418 | 10 | 0.029                   |
| mitochondrion organization                                                                                       | GO:0007005 | 14 | 0.031                   |
| ribosomal large subunit biogenesis                                                                               | GO:0042273 | 8  | 0.030                   |
| regulation of cellular amino acid metabolic process                                                              | GO:0006521 | 11 | 0.040                   |

| Term (translationally up in NPC vs hESC)                      | ID         | N  | p (Benjamini-corrected) |
|---------------------------------------------------------------|------------|----|-------------------------|
| positive regulation of transcription, DNA-templated           | GO:0045893 | 46 | 0.0029                  |
| vascular endothelial growth factor receptor signaling pathway | GO:0048010 | 14 | 0.0077                  |
| cell migration                                                | GO:0016477 | 21 | 0.020                   |
| axon guidance                                                 | GO:0007411 | 20 | 0.017                   |
